# Supplementary material for: Exploring Ozone-climate Interactions in Idealized CMIP6 DECK Experiments
Source: Copernicus journal article supplement (doi:10.5194/egusphere-2025-340), 2025-02-13
Supplement: Supplementary file [file egusphere-2025-340-AC1-supplement.pdf]

Here is the updated Figure 2:

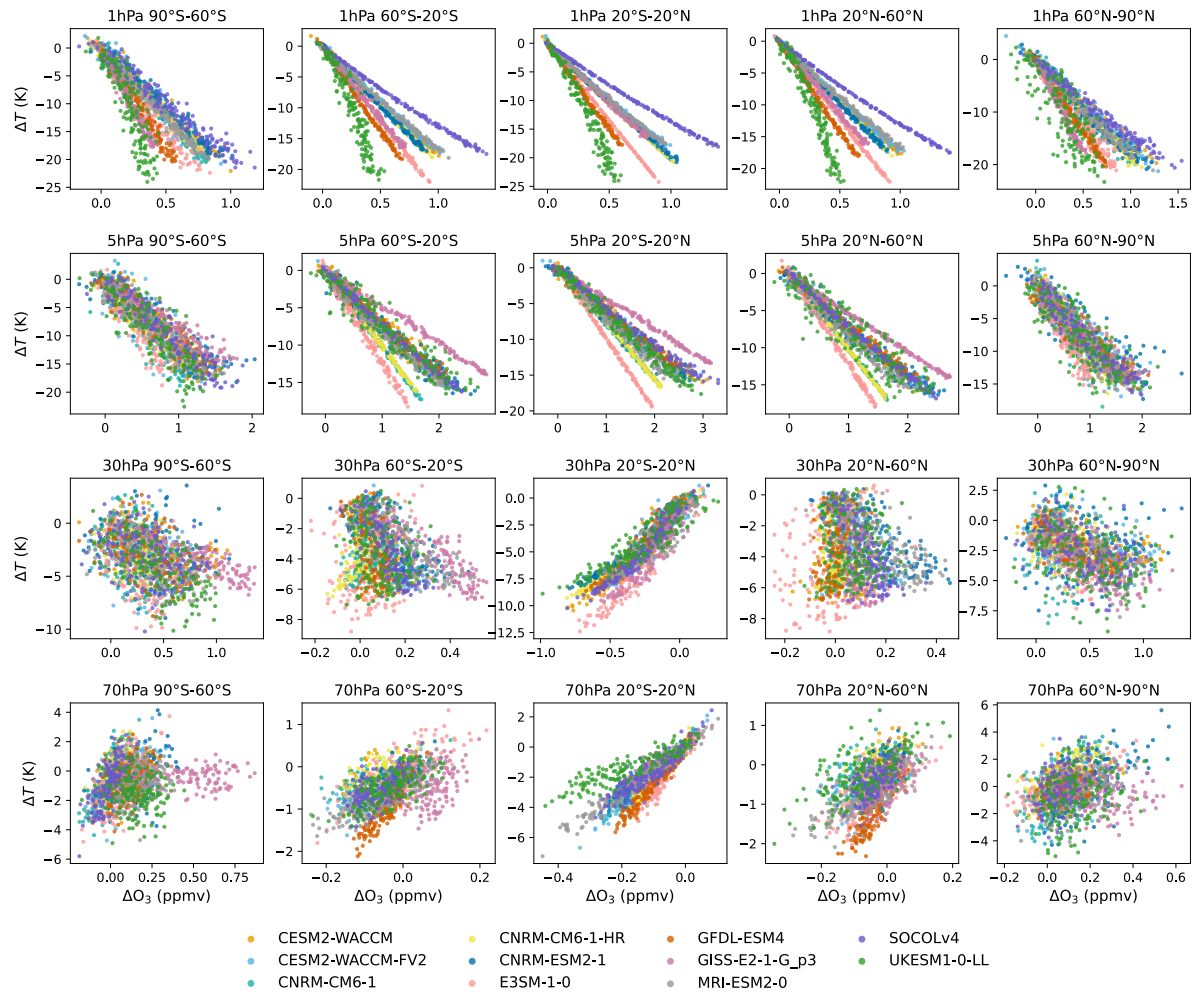

Figure 2. 150-year-long annual-mean ozone response to temperature change in stratosphere at different pressure levels and latitude bands based on the 1pctCO2 experiment.

Here is the updated Figure 3:

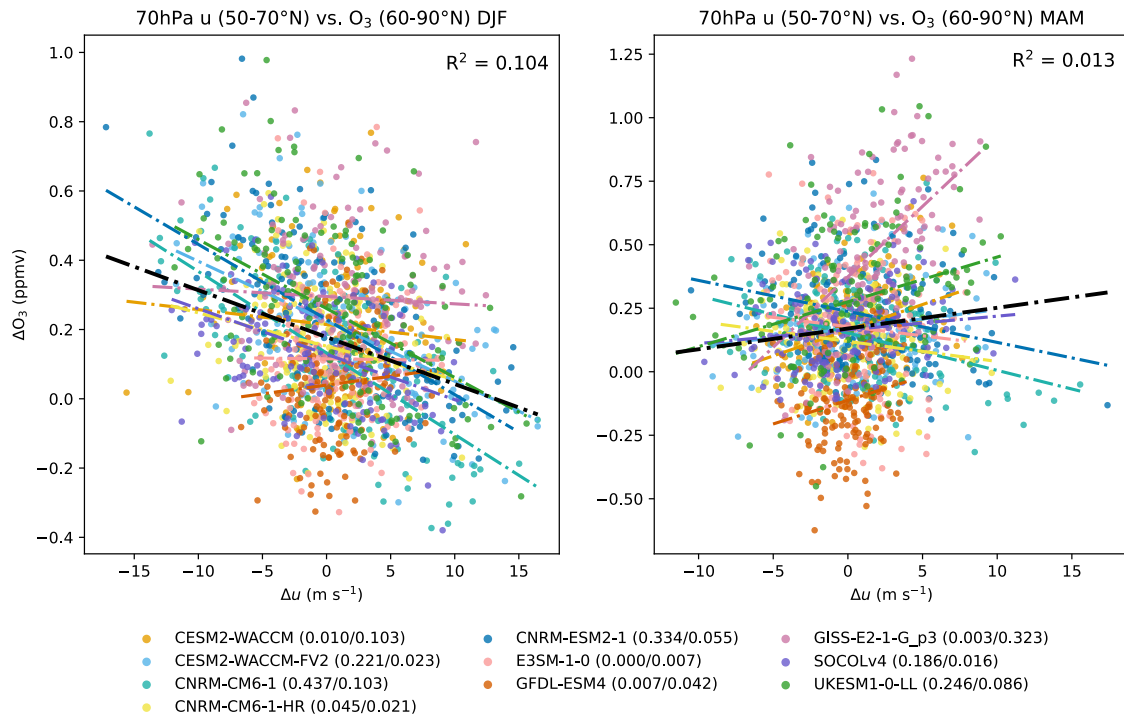

Figure 3. 150-year-long seasonal-mean ozone response in 60-90N to zonal wind (u) change in 50-70N at 70hPa in MAM and DJF for 1pctCO<sub>2</sub>. Fitting lines retrieved from linear regression are plotted as dash-dotted lines with the corresponding color for each model. The thick black line is fitted using data from all models with the corresponding R<sup>2</sup> denoted in the upper right corner of the plot. R<sup>2</sup> values for each model are denoted in the legend for DJF and MAM respectively.
